# Supplementary material for: Aza-Reversine Promotes Reprogramming of Lung (MRC-5) and Differentiation of Mesenchymal Cells into Osteoblasts
Source: MDPI journal article supplement (doi:10.3390/ma14185385), 2021-09-17
Supplement: s1 [file s1]

## Supplementary Materials

### Aza-Reversine Promotes Reprogramming of Lung (MRC-5) and Differentiation of Mesenchymal Cells into Osteoblasts

Fani Tsitouroudi <sup>1</sup>, Vasiliki Sarli <sup>1,\*</sup>, Dimitrios Poulcharidis <sup>1</sup>, Maria Pitou <sup>1</sup>, Alexandros Katranidis <sup>2</sup> and Theodora Choli-Papadopoulou <sup>1,\*</sup>

<sup>1</sup> Department of Chemistry, Aristotle University of Thessaloniki, University Campus, 54124 Thessaloniki, Greece

<sup>2</sup> Institute of Biological Information Processing IBI-6, Forschungszentrum Jülich (FZJ), 52425 Jülich, Germany

\* Author to whom correspondence should be addressed.

Correspondence: tcholi@chem.auth.gr (T.C.-P.); sarli@chem.auth.gr (V.S.)

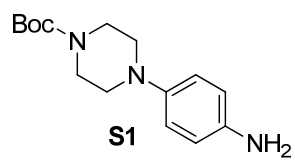

SB396

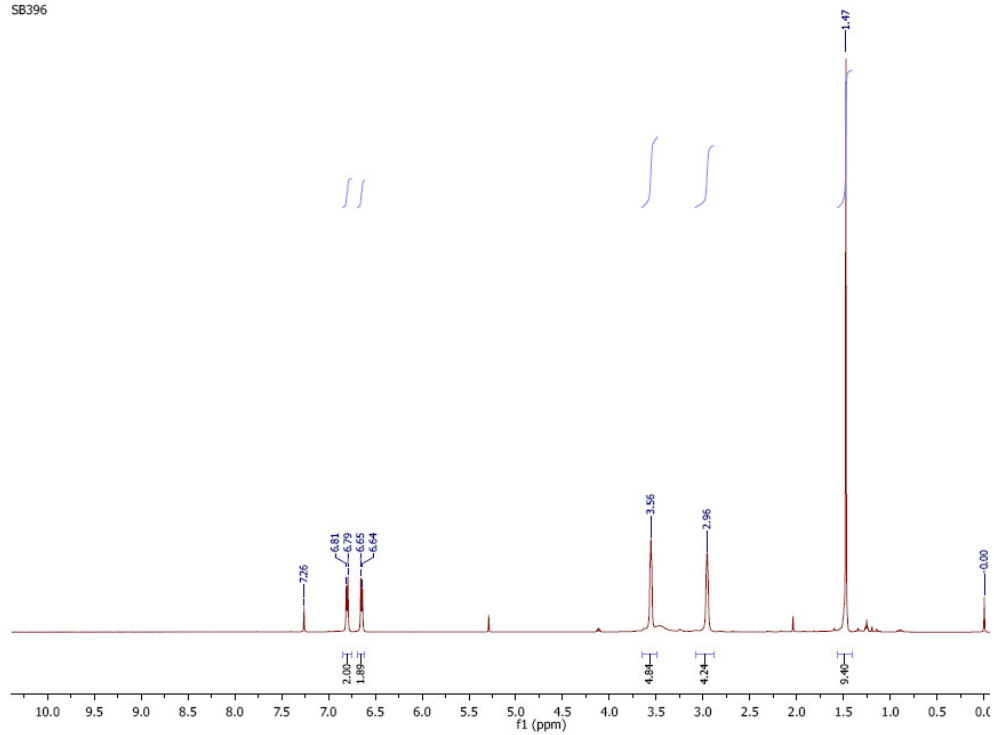

SB396

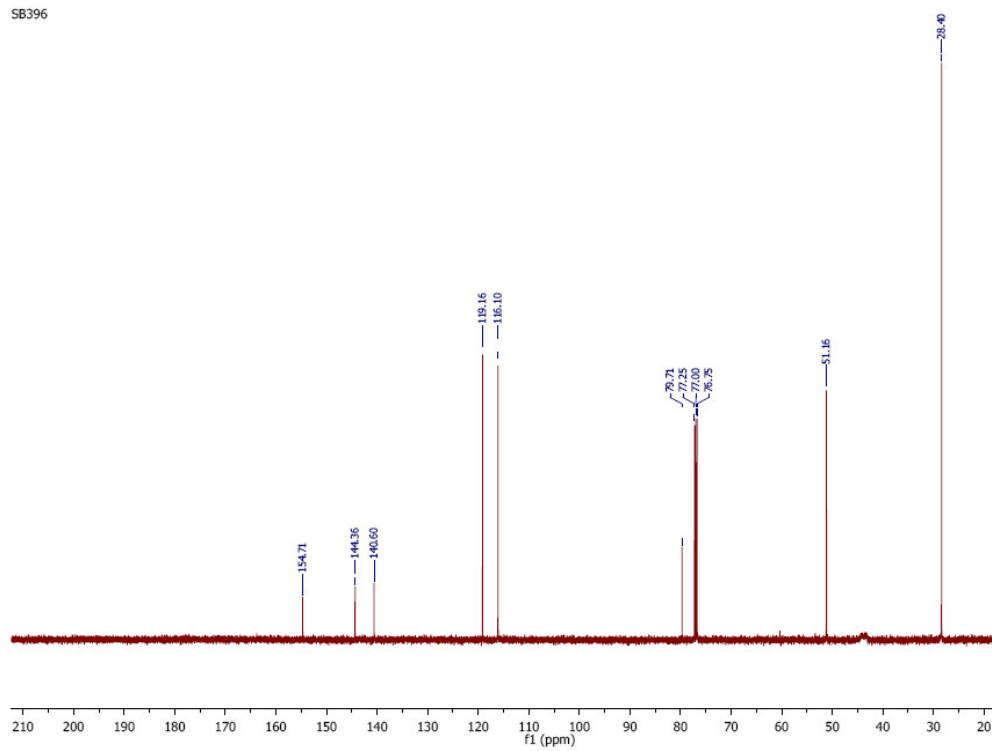

**Figure S1.** <sup>1</sup>H and <sup>13</sup>C NMR spectra of S1.

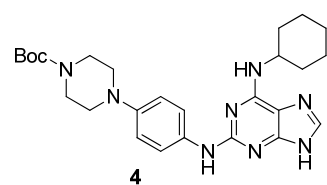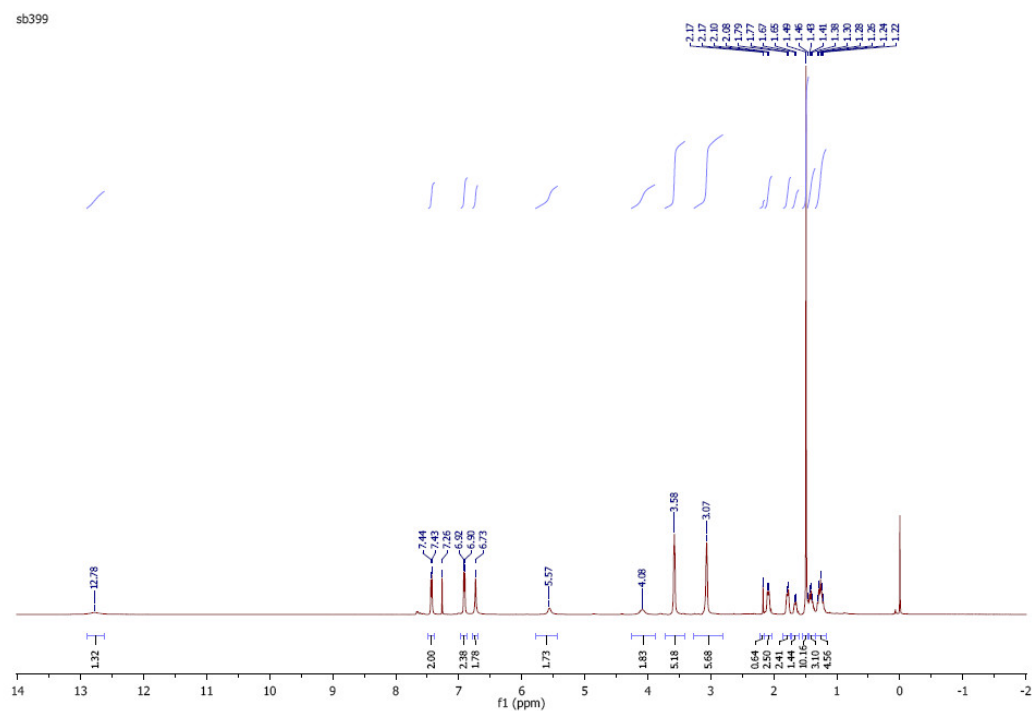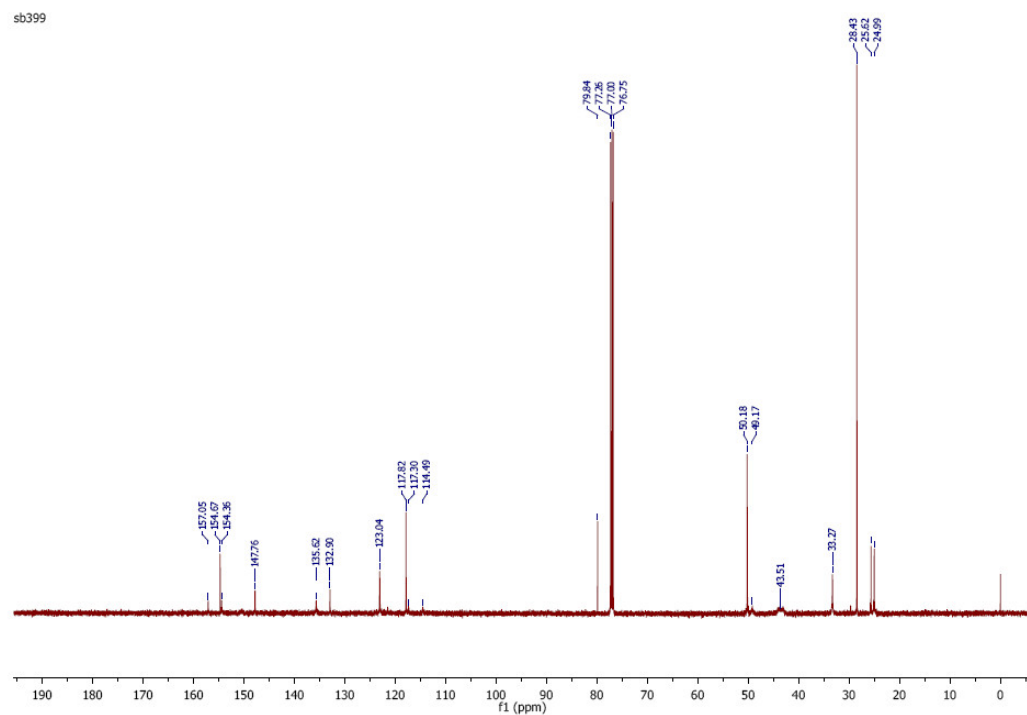

Figure S2. <sup>1</sup>H and <sup>13</sup>C NMR spectra of 4.

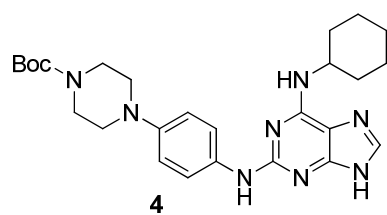

gDQCOSY

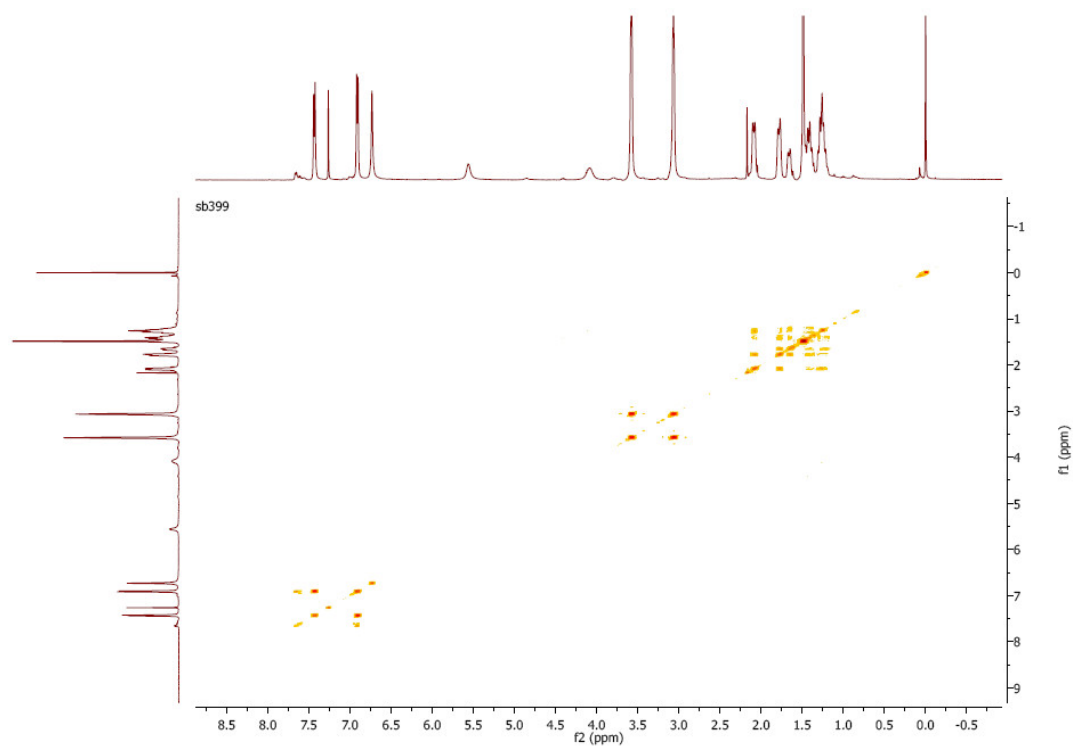

**Figure S3.** gDQCOSY spectrum of **4**.

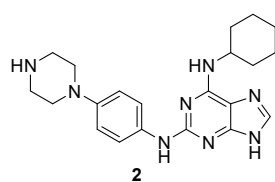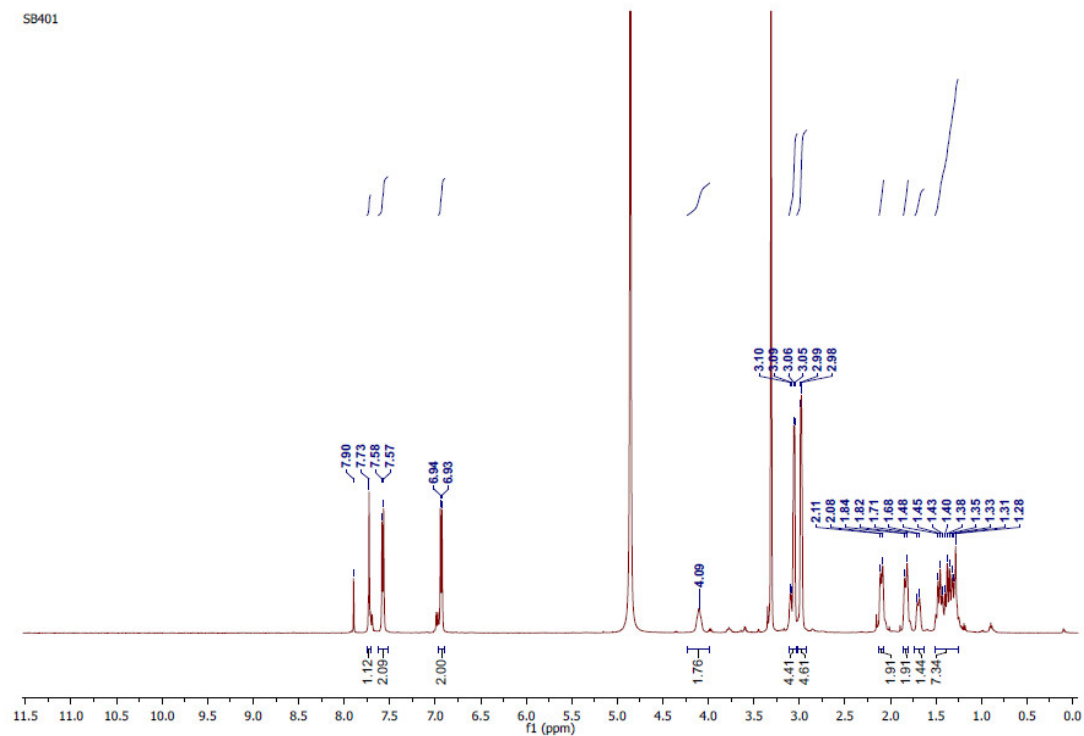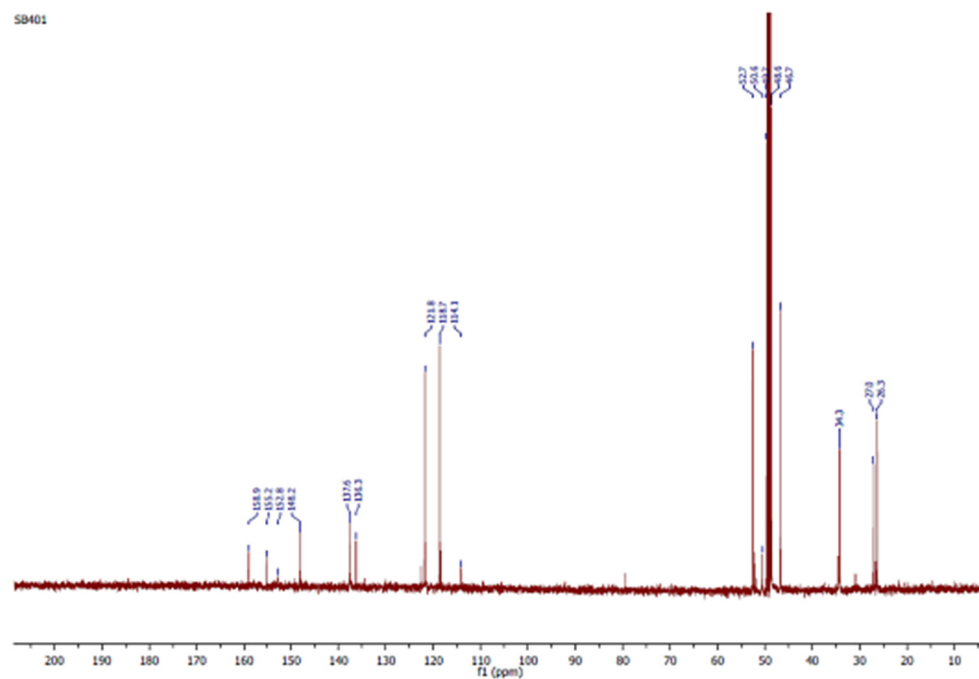

Figure S4. <sup>1</sup>H and <sup>13</sup>C NMR spectra of 2.

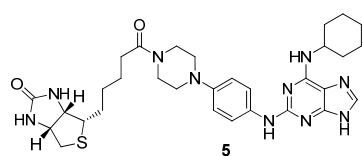

SB428

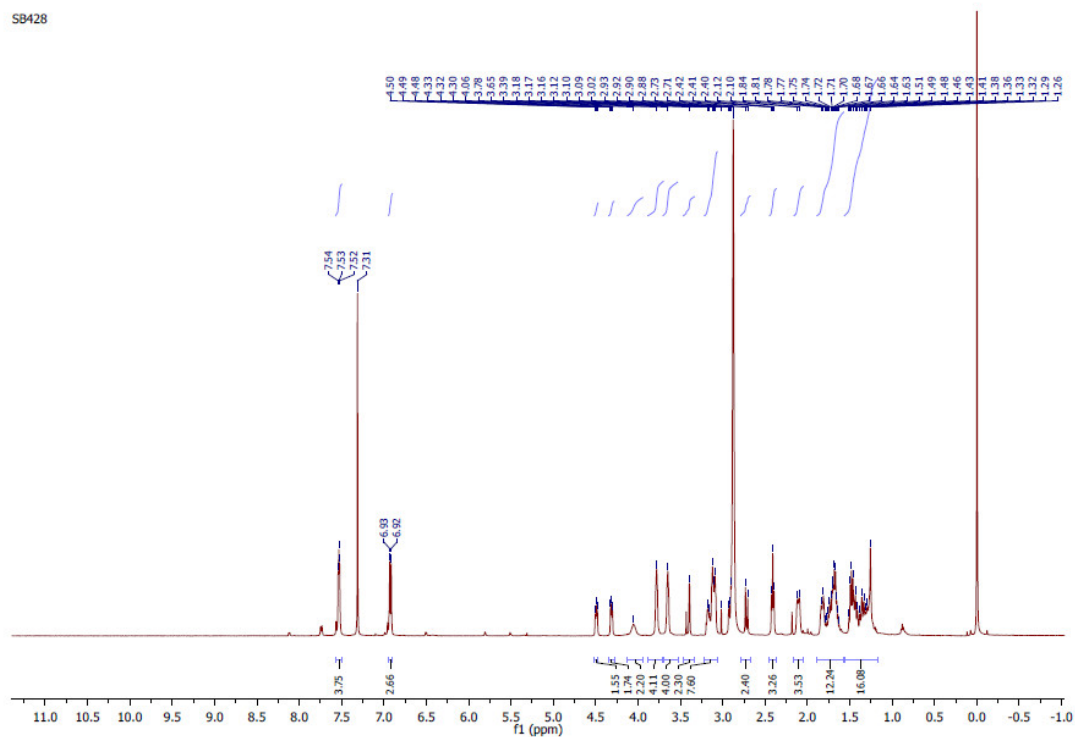

SB428

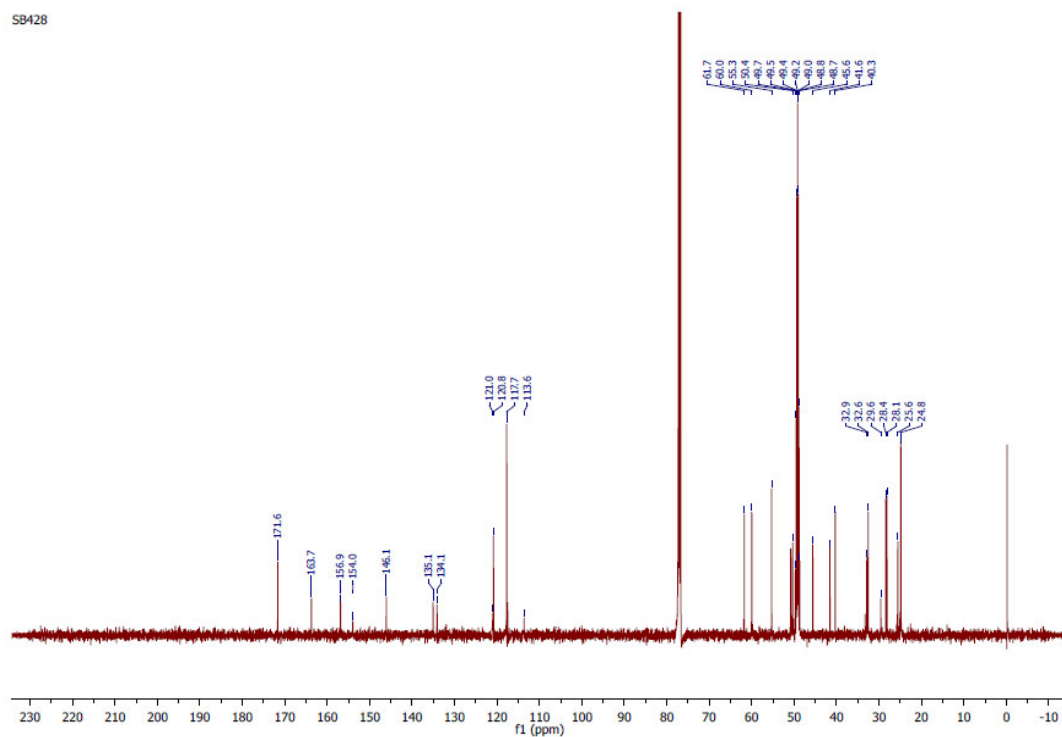

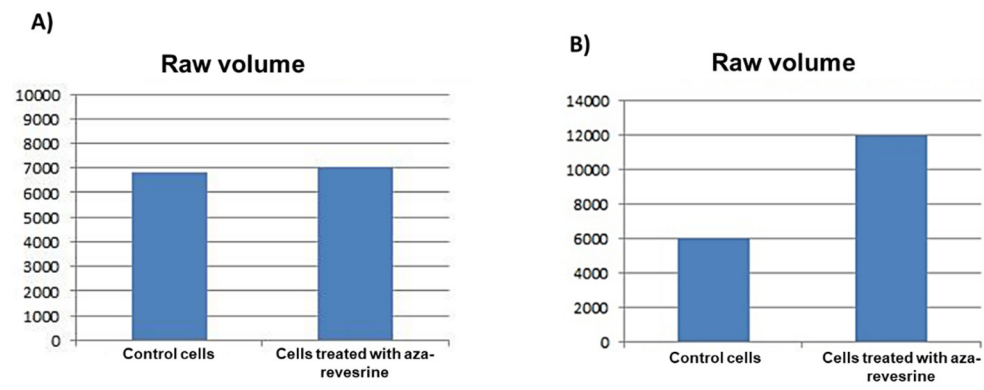

**Figure S6.** Quantification of band intensity after rt-PCR (a) Gus-B, (b) osteocalcin.
